# Supplementary material
Source: PubMed Central journal article supplement (PMC3911126)
Supplement: JB.00916-13_zjb999092957so1.pdf [file JB.00916-13_zjb999092957so1.pdf]

# Identification of crucial amino acids of bacterial peptide deformylases affecting enzymatic activity in response to oxidative stress

Sanjay Kumar, Pavitra Kanudia, Subramanian Karthikeyan and Pradip K. Chakraborti

CSIR-Institute of Microbial Technology, Sector 39A, Chandigarh 160 036, India.

## SUPPLEMENTARY MATERIAL

TABLE S1. List of PCR primers used in this study

| Primer name       | Primer sequence (5' to 3')                  | Wild-type/<br>Variant |
|-------------------|---------------------------------------------|-----------------------|
| CK1(sense)        | 5' GGAATTCCATATGTCAGTTTTGCAAGTGTTACATATT 3' | sPDF                  |
| CK2(antisense)    | 5' CCCAAGCTTTTAAGCCCGGGCGTTCAG 3'           |                       |
| CK63 (sense)      | 5' CGTGATTGACTGTTCGGAAAACCG 3'              | V63C                  |
| CK64 (antisense)  | 5' CGGTTTTCCGAACAGTCAATCACG 3'              |                       |
| CK90 (sense)      | 5' ATAGAAGAAGGCTCTCTGTCGATTCCGGA 3'         | C90S                  |
| CK91 (antisense)  | 5' TCCGGAATCGACAGAGAGCCTTCTTCTAT 3'         |                       |
| CK130 (sense)     | 5' TTA CTGGCAATTATGATT CAGCATGA 3'          | C130M                 |
| CK131 (antisense) | 5' TCATGCTGAATCATAATTGCCAGTAA 3'            |                       |
| CK132 (sense)     | 5' TTA CTGGCAATTTCCATT CAGCATGA 3'          | C130S                 |
| CK133 (antisense) | 5' TCATGCTGAATGGAAATTGCCAGTAA 3'            |                       |
| CR26 (sense)      | 5' AAAACATATGGCAGTCGTACCTATC 3'             | mPDF                  |
| CR27 (antisense)  | 5' AAAAAGCTTAGTGCCCGAACGGGTC 3'             |                       |
| CK59 (sense)      | 5' CCAGATCGGCTCCAGCCTGCGGCTC 3'             | C59S                  |
| CK60 (antisense)  | 5' GAGCCGCAGGCTGGAGCCGATCTGG 3'             |                       |
| CK68 (sense)      | 5' CGTCTACGATAGCGCCGCGGACC 3'               | C68S                  |
| CK69 (antisense)  | 5' GGTCCGCGGCGCTATCGTAGACG 3'               |                       |
| CR45(sense)       | 5' GACGAAGGCTCACTGTCGGTT 3'                 | C106S                 |
| CR44 (antisense)  | 5' AACCGACAGTGAGCCTTCGTC 3'                 |                       |
| CK145 (sense)     | 5' GTTCGCGCGGTGTCTGCAGCACG 3'               | M145C                 |
| CK146 (antisense) | 5' CGTGCTGCAGACACCGCGCGAAC 3'               |                       |
| CK147 (sense)     | 5' GTTCGCGCGGTTCGCTGCAGCACG 3'              | M145S                 |
| CK148 (antisense) | 5' CGTGCTGCAGCGACCGCGCGAAC 3'               |                       |
